# Supplementary material
Source: PubMed Central journal article supplement (PMC4996689)
Supplement: NIHMS793190-supplement.pdf [file NIHMS793190-supplement.pdf]

## **ELECTRONIC SUPPLEMENTARY MATERIAL**

Rosvall, Bergeon Burns, Jayaratna, Ketterson. Divergence along the gonadal steroidogenic pathway: implications for hormone-mediated phenotypic evolution.

### **Supplementary quantitative PCR methods:**

We used published primer sets whenever possible (CYP17, p450scc), and we otherwise designed primers based on zebra finch sequences (StAR, 3 $\beta$ HSD, RPL13A) for which we confirmed high sequence identity in the junco transcriptome (Peterson et al. 2012). Each qPCR well contained 2.5 $\mu$ L of cDNA (diluted 1:10 from stock), 12.5 $\mu$ L of PerfeCta SYBR green low ROX, and forward and reverse primers (0.3 $\mu$ M) in a total volume of 25 $\mu$ L. Our thermal profile was: 10 min at 95°C; 40 cycles of 95°C for 30s, 60°C for 1 min, and 70°C for 30s; and a dissociation phase that assessed product specificity (95°C for 1 min, 55°C for 30s, and 95°C for 1 min). Dissociation curves demonstrated highly specific amplification for each GOI. We used a 5-point standard curve to assess amplification efficiencies (range: 97.7 to 107.5%) and corrected for this slight variation from perfect efficiency in MxPro.

### **Bibliography for supplementary methods:**

Peterson, M. P., Whittaker, D. J., Ambreth, S., Sureshchandra, S., Buechlein, A., Podicheti, R., Choi, J.-H., Lai, Z., Mockatis, K., Colbourne, J., Tang, H. & Ketterson, E. D. 2012. De novo transcriptome sequencing in a songbird, the dark-eyed junco (*Junco hyemalis*): genomic tools for an ecological model system. *BMC Genomics*, 13, 305.

**ESM Table 1.** Primer sequences, amplicon size, and GenBank accession numbers for source sequences.

| <b>StAR</b>                     |                              |
|---------------------------------|------------------------------|
| <b>Forward</b>                  | TGGGCCAGCACATGCTAGTTAAGCAA   |
| <b>Reverse</b>                  | AGCAGGGCTTCCTTCAGGAACCAAGTAT |
| <b>Amplicon size</b>            | 194 bp                       |
| <b>GenBank accession no.</b>    | NM_001076686.2               |
| <b>Amplification efficiency</b> | 103.5%                       |
| <b>p450scc</b>                  |                              |
| <b>Forward</b>                  | GACCGCGAGAAGATGCTGAAA        |
| <b>Reverse</b>                  | TCTCCTTGATGGTGGCCTTGAG       |
| <b>Amplicon size</b>            | 55 bp                        |
| <b>GenBank accession no.</b>    | NM_001127374.1               |
| <b>Amplification efficiency</b> | 97.7%                        |
| <b>CYP17</b>                    |                              |
| <b>Forward</b>                  | CATCAACCTCTGGTCTGTGCAC       |
| <b>Reverse</b>                  | AAGCGGCCAGGATTGAACT          |
| <b>Amplicon size</b>            | 72 bp                        |
| <b>GenBank accession no.</b>    | AY313844.1                   |
| <b>Amplification efficiency</b> | 105.9%                       |
| <b>3<math>\beta</math>HSD</b>   |                              |
| <b>Forward</b>                  | ATGAGCTACGCTGACCTGAA         |
| <b>Reverse</b>                  | CAGCAGCAGCGAGAAGTAATAG       |
| <b>Amplicon size</b>            | 108 bp                       |
| <b>GenBank accession no.</b>    | NM_001048264.1               |
| <b>Amplification efficiency</b> | 107.1%                       |
| <b>Ribosomal protein L13A</b>   |                              |
| <b>Forward</b>                  | GCACCACCATGCGCTTCCGCTGT      |
| <b>Reverse</b>                  | TTCCACTTCCAGCCCCAGCCG        |
| <b>Amplicon size</b>            | 148                          |
| <b>GenBank accession no.</b>    | DQ216005.1                   |
| <b>Amplification efficiency</b> | 107.5%                       |

**ESM Table 2. Bivariate correlation coefficients among expression values of all 4 genes.** \*p<0.05, \*\*p<0.01, \*\*\*p<0.0001. Values above the diagonal (shaded) are from field samples (n=34); values below the diagonal (unshaded) are from captivity (n=45).

|                | <i>StAR</i> | <i>p450scc</i> | <i>CYP17</i> | <i>3βHSD</i> |
|----------------|-------------|----------------|--------------|--------------|
| <i>StAR</i>    | -           | 0.3398*        | 0.3238       | 0.6173***    |
| <i>p450scc</i> | -0.1334     | -              | 0.7288***    | 0.3249       |
| <i>CYP17</i>   | -0.1579     | 0.5429***      | -            | 0.4068*      |
| <i>3βHSD</i>   | 0.3581*     | -0.0298        | 0.0716       | -            |
